# Supplementary material
Source: PubMed Central journal article supplement (PMC4068540)
Supplement: AAC.02686-13_zac006142966so1.pdf [file AAC.02686-13_zac006142966so1.pdf]

1 SUPPLEMENTARY TABLE S1 Cases of proven, probable, and possible IFD reported during  
 2 the study

| Proven/<br>probable/<br>possible <sup>a</sup> | Details                                         | Evidence                            | POS IV<br>dose, mg | Study<br>day | C <sub>avg</sub> , ng/mL       |
|-----------------------------------------------|-------------------------------------------------|-------------------------------------|--------------------|--------------|--------------------------------|
| Proven                                        | Candidemia<br><br>Disseminated<br>aspergillosis | Culture<br><br>Autopsy results      | 200                | 3<br><br>24  | Not<br>calculated <sup>b</sup> |
| Proven                                        | Pulmonary<br>aspergillosis                      | Radiographic and<br>histopathologic | 300                | 21           | 1370                           |
| Possible                                      | Pulmonary fungal<br>infection                   | Radiographic                        | 300                | 36           | 1540                           |
| Possible                                      | Pulmonary fungal<br>infection                   | Radiographic                        | 300                | 7            | 2230 <sup>c</sup>              |
| Possible                                      | Pulmonary fungal<br>infection                   | Radiographic                        | 300                | 7            | 663                            |
| Possible                                      | Pulmonary fungal<br>infection                   | Radiographic                        | 300                | 30           | 2910                           |

3 C<sub>avg</sub>, average plasma concentration; IFD, invasive fungal disease; IV, intravenous; POS, posaconazole.

4 <sup>a</sup>According to the revised European Organization for Research and Treatment of Cancer Mycoses Study  
 5 group (<sup>18</sup>).

6 <sup>b</sup>Study medication was stopped on day 5, and C<sub>avg</sub> was not calculated. Day 3 concentration was 1080  
 7 ng/mL.

8 <sup>c</sup>C<sub>min</sub>, day 6.
